# Supplementary material for: 3-Dimensional porous nanocomposite scaffolds based on cellulose nanofibers for cartilage tissue engineering: tailoring of porosity and mechanical performance
Source: Royal Society of Chemistry journal article supplement (doi:10.1039/c5ra27246g), 2016-01-01

## Supporting information

**S1:** SEM images showing the effect of suspension concentration on the pore structure.

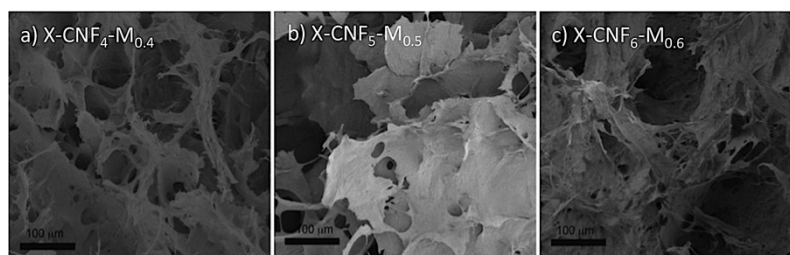

**S2:** Representative stress-strain curves.

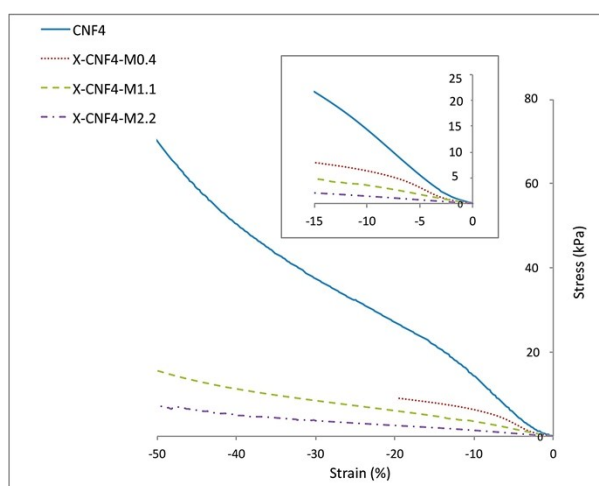

Supplement: c5ra27246g1.pdf [file c5ra27246g1.pdf]
